# Supplementary material
Source: PubMed Central journal article supplement (PMC3127254)
Supplement: NIHMS301839-supplement-Supp_Data.pdf [file NIHMS301839-supplement-Supp_Data.pdf]

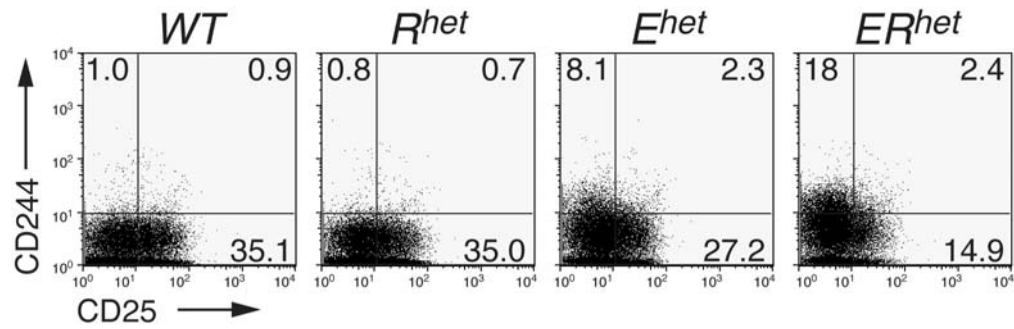

**Supplementary Figure 1: Lack of CD244 expression on CD19<sup>+</sup>-gated CD25<sup>+</sup> cells from the bone marrow.** All data are representative of greater than five independent experiments. Cell staining and analysis were performed using CD19-Pacific Blue, CD25-Alexa Fluor 488 and CD244-Alexa Fluor 647 (all from eBioscience, San Diego, CA, USA).

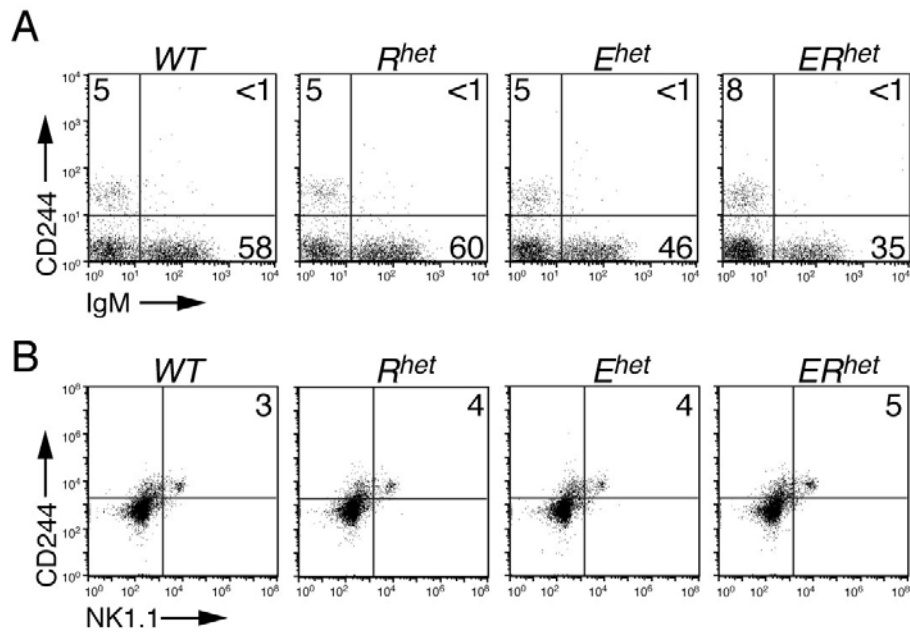

**Supplementary Figure 2: Expression of CD244 on splenocytes of WT and mutant mice.** A. Splenocytes were stained with CD244- and IgM-specific antibodies for detection by flow cytometry. B. Splenocytes were stained with CD244- and NK1.1-specific antibodies for detection by flow cytometry. Cell staining and analysis were performed with the following antibodies: CD244-Alexa Fluor 647 (eBioscience, San Diego, CA), IgM-FITC (BD Pharmingen, San Diego, CA) and NK1.1-PE (eBioscience, San Diego, CA).

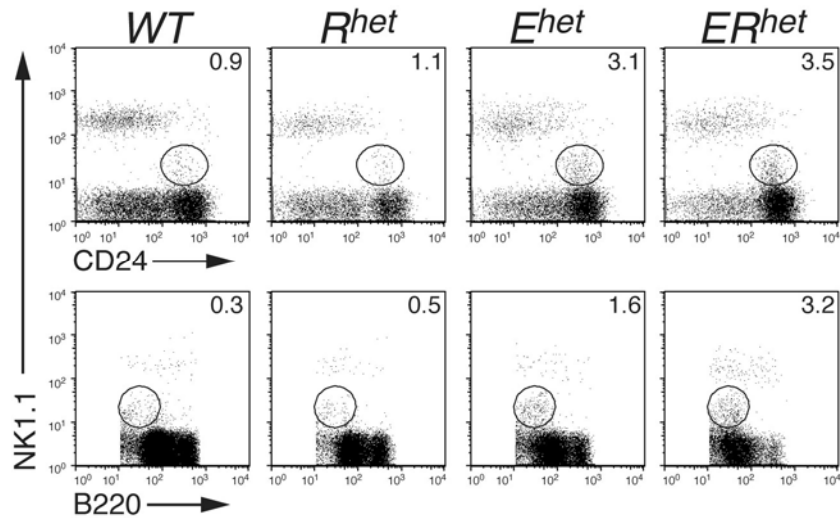

**Supplementary Figure 3: NK1.1 expression on bone marrow cells of WT and mutant mice.**

Expression of NK1.1 on B220<sup>+</sup>CD43<sup>+</sup>-gated CD24<sup>+</sup> bone marrow cells (upper panel); expression of NK1.1 on B220<sup>+</sup>CD43<sup>-</sup>-gated B220<sup>lo</sup> bone marrow cells (lower panel). B220<sup>+</sup>CD43<sup>+</sup>-gated NK1.1<sup>hi</sup>CD24<sup>-</sup> cells are NK cell progenitors [1]. The data are representative of three independent experiments. Cell staining and analysis were performed with the following antibodies: B220-FITC (eBioscience, San Diego, CA), CD43-APC (BD Pharmingen, San Diego, CA), CD24-biotin (BD Pharmingen, San Diego, CA) with SA-APC-Cy7 (Biolegend, San Diego, CA) and NK1.1-PE (eBioscience, San Diego, CA).

1 **Rolink, A., ten Boekel, E., Melchers, F., Fearon, D. T., Krop, I. and Andersson, J.,** A subpopulation of B220<sup>+</sup> cells in murine bone marrow does not express CD19 and contains natural killer cell progenitors. *J Exp Med* 1996. **183**: 187-194.

**Supplementary Table 1. NK cell-specific transcripts are enriched in RNA from pre-B cells of *ER<sup>het</sup>* mice.<sup>a</sup>**

| <b>Gene</b>                                                     | <b>Symbol</b> | <b>WT pre-B cells</b> |         | <b><i>ER<sup>het</sup></i> pre-B cells</b> |         |
|-----------------------------------------------------------------|---------------|-----------------------|---------|--------------------------------------------|---------|
| <i>Granzyme B</i>                                               | <i>Gzmb</i>   | 36.07                 | 51.19   | 120.56                                     | 176.48  |
| <i>Interferon gamma</i>                                         | <i>Irfng</i>  | 43.12                 | 106.55  | 390.37                                     | 499.12  |
| <i>CD244 (2B4)</i>                                              | <i>Cd244</i>  | 43.42                 | 62.77   | 192.21                                     | 256.56  |
| <i>Killer cell lectin-like receptor family E member 1</i>       | <i>Klre1</i>  | 45.71                 | 64.91   | 179.37                                     | 226.54  |
| <i>Killer cell lectin-like receptor, subfamily D, member 1</i>  | <i>Klrk1</i>  | 155.16                | 158.52  | 629.23                                     | 1213.95 |
| <i>Natural killer cell group 7 sequence</i>                     | <i>Nkg7</i>   | 127.75                | 192.66  | 642.77                                     | 912.29  |
| <i>Killer cell lectin-like receptor, subfamily A, member 7</i>  | <i>Klrb1a</i> | 67.21                 | 45.42   | 288.32                                     | 467.51  |
| <i>Granzyme A</i>                                               | <i>Gzma</i>   | 817.15                | 1024.72 | 2407.22                                    | 2786.82 |
| <i>Killer cell lectin-like receptor, subfamily A, member 3</i>  | <i>Klrc3</i>  | 274.79                | 533.61  | 1498.28                                    | 1714.65 |
| <i>Killer cell lectin-like receptor, subfamily A, member 18</i> | <i>Klra18</i> | 48.71                 | 118.88  | 333.29                                     | 370.79  |
| <i>Fas ligand (TNF superfamily, member 6)</i>                   | <i>Fasl</i>   | 38.13                 | 25.36   | 259.03                                     | 143.53  |
| <i>Eomesodermin homolog (Xenopus laevis)</i>                    | <i>Eomes</i>  | 68.60                 | 50.84   | 264.57                                     | 298.40  |
| <i>Klra8 / Klra21 / LOC545879</i>                               |               | 107.14                | 145.59  | 818.81                                     | 642.14  |

<sup>a</sup>RNA was extracted from purified adult B220<sup>+</sup>CD2<sup>+</sup>IgM<sup>-</sup> bone marrow pre-B cells as described for qRT-PCR using a QIAGEN RNeasy Micro Kit [1]. RNA was labeled and amplified according to the Affymetrix<sup>TM</sup> GeneChip Expression Analysis Technical Manual and hybridized against MOE430 2.0 Affymetrix gene expression arrays chips. Chips were scanned using a GeneChip<sup>TM</sup> Scanner 3000. Probe level expression values were calculated using RMAExpress [2] and further analysis was done using dChip (www.dchip.org)[3]. Cluster analyses have been done with a list of genes with at least 2 times differential expression in either of cell populations.

- 1 **Zandi, S., Månsson, R., Tsapogas, P., Zetterblad, J., Bryder, D., Sigvardsson, M., EBF1 is essential for B-lineage priming and establishment of a transcription factor network in common lymphoid progenitors. *J Immunol* 2008. **181**:3364-3372.**
- 2 **Irizarry, R.A., Hobbs, B., Collin, F., et al., Exploration, normalization, and summaries of high density oligonucleotide array probe level data. *Biostatistics* 2003. **4**:249-264.**
- 3 **Li, C., Wong, W.H., Model-based analysis of oligonucleotide arrays: expression index computation and outlier detection. *Proc Natl Acad Sci U S A* 2001. **98**:31-36.**

**Supplementary Table 2: PCR primers used in these studies.**

| <b>Gene</b>            | <b>Forward Primer</b>                                         | <b>Reverse Primer</b>                                          |
|------------------------|---------------------------------------------------------------|----------------------------------------------------------------|
| <b>qRT-PCR</b>         |                                                               |                                                                |
| <i>Hprt</i>            | 5'-GGGGGCTATAAGTTCTTTGCTGACC-3'                               | 5'-CCTGTATCCAACACTTCGAGAGGTCC-3'                               |
| <i>Cd244</i>           | 5'-TGAGGTAGTCTCGCTGTGTCCTGC-3'                                | 5'-GCCCTGTTCTGTCTTCTTCCATTG-3'                                 |
| <i>Cd160</i>           | 5'-CCTGGCCAAAGCTGCTGTGC-3'                                    | 5'-GCCACAAAGTACAGGTGAGGTCCAG-3'                                |
| <i>Klrb1c</i>          | 5'-TGGACACAGCAAGTATCTACCTCG-3'                                | 5'-GACTCGCACTAAGACACTCATCCC-3'                                 |
| <i>Ly6a</i>            | 5'-GGAGTCCCATTTGAGACTTCTTGCC-3'                               | 5'-GCTACATTGCAGAGGTCTTCTGGC-3'                                 |
| <i>Igll1</i>           | 5'-TTGGTATGTCTTTGGTGGTGGGAC-3'                                | 5'-TAAGGAAGGCAGGAACAGAGTGAC-3'                                 |
| <b>Single cell PCR</b> |                                                               |                                                                |
| <i>Hprt</i>            | 5'-GGGGGCTATAAGTTCTTTGC-3'<br>5'-GTTCTTTGCTGACCTGCTGG-3'      | 5'-TCCAACACTTCGAGAGGTCC-3'<br>5'-TGGGGCTGTACTGCTTAACC-3'       |
| <i>Pax5</i>            | 5'-CTACAGGCTCCGTGACGCAG-3'<br>5'-ATGGCCACTCACTTCCGGGC-3'      | 5'-TCTCGGCCTGTGACAATAGG-3'<br>5'-GTCATCCAGGCCTCCAGCCA-3'       |
| <i>Cd79a</i>           | 5'-CCTCCTCTTCTTGTGCATACG-3'<br>5'-AAACAATGGCAGGAACCC-3'       | 5'-GAACAGTCATCAAGTTTCAGG-3'<br>5'-TGATGATGCGGTTCTTGG-3'        |
| <i>Cd244</i>           | 5'-TTAGCCTTCTGATTCCACATCAC-3'<br>5'-ATATTCAGTAGTCCAGCCTTCC-3' | 5'-ATGCTGCATGACACAGGATGAGG-3'<br>5'-ATCAAAGTTCTCCAGCTCTCTGC-3' |
| <i>Cd160</i>           | 5'-GACCAACTTAGAACAGCTTAGG-3'<br>5'-TTGGTGTTCAACATAGAACAAGC-3' | 5'-CAGGAAGCCTGAACTGAGAGTGC-3'<br>5'-CGTTGATATGGCTGAAGTCAGG-3'  |
| <i>Klrb1c</i>          | 5'-CAGGTTGGCTCTGAAGCTCAGC-3'<br>5'-GCTCATCCTCCTTGTCTGACC-3'   | 5'-ACAGTCAGCTTGACCTTCTCC-3'<br>5'-GAAACGTGAAAGCACTTATCTCG-3'   |
